# Supplementary material
Source: publisher figshare collection journal article supplement (https://acs.figshare.com/ndownloader/files/4562389)
Supplement: Supplementary file 1 [file 4562389]

## Supporting Information

# 1-*tert*-Butyl-3,3,5,5-tetraalkyl-2-piperazinon-4-oxyls - Highly Efficient Nitroxides for Controlled Radical Polymerization

*Saskia Miele,<sup>†</sup> Peter Nesvadba<sup>‡</sup> and Armido Studer<sup>†,\*</sup>*

<sup>†</sup>Institute of Organic Chemistry, Department of Chemistry, Westfälische Wilhelms-Universität Münster, Corrensstraße 40, 48149 Münster, Germany. <sup>‡</sup>Research Center Polymerization and Curing Agents, Ciba Inc., Schwarzwaldallee 215, CH-4002 Basel, Switzerland.

# 1 Kinetic Studies by NMR.

## 1.1 in DMSO-d6.

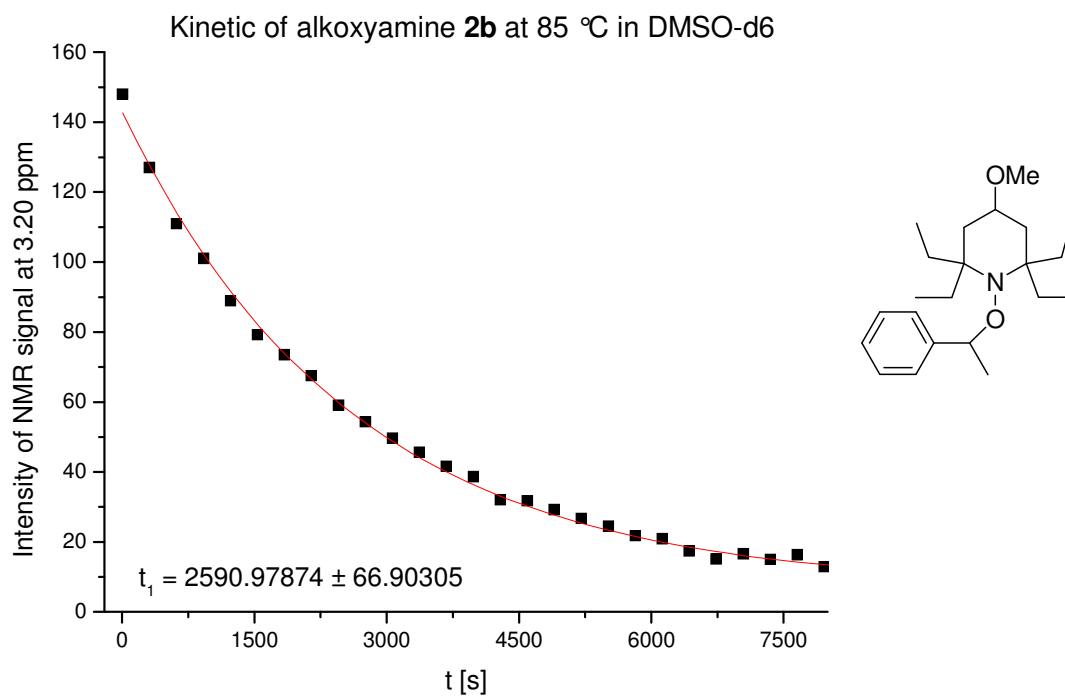

$$k_d = 1/t_1 = 3.86 \times 10^{-4} \text{ s}^{-1}, E_a = 122.0 \text{ kJ/mol}$$

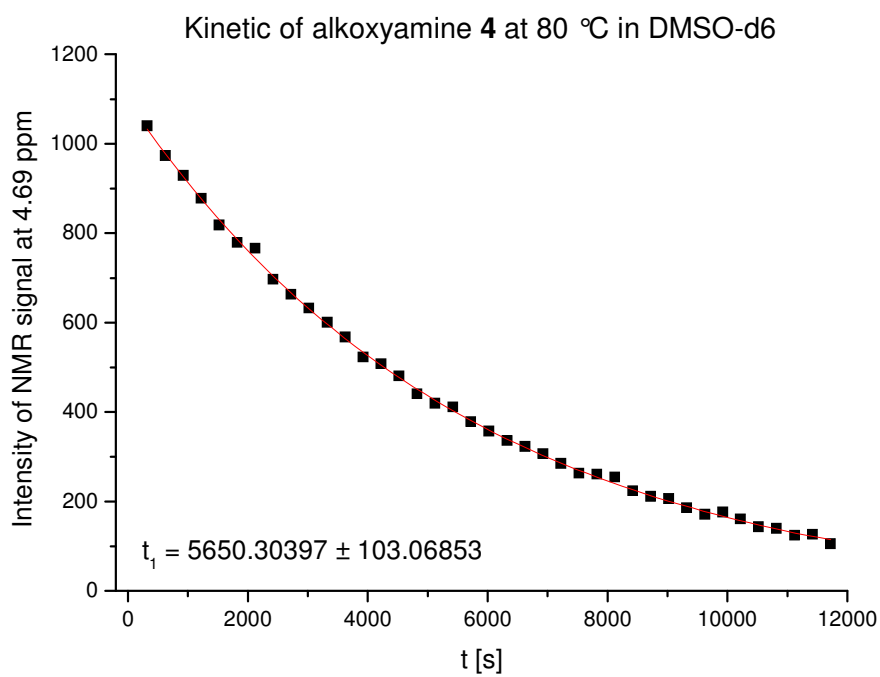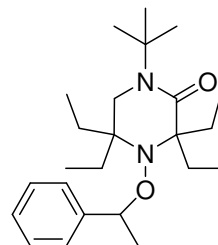

$$k_d = 1/t_1 = 1.77 \times 10^{-4} \text{ s}^{-1}, E_a = 122.6 \text{ kJ/mol}$$

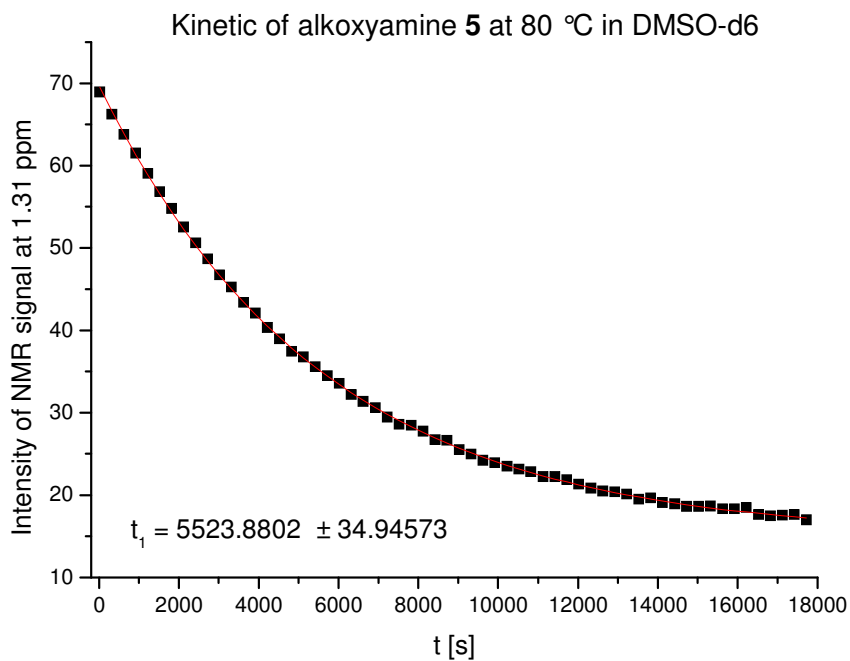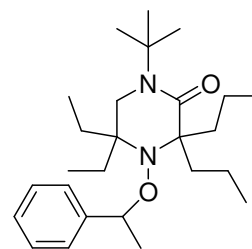

$$k_d = 1/t_1 = 1.81 \times 10^{-4} \text{ s}^{-1}, E_a = 122.5 \text{ kJ/mol}$$

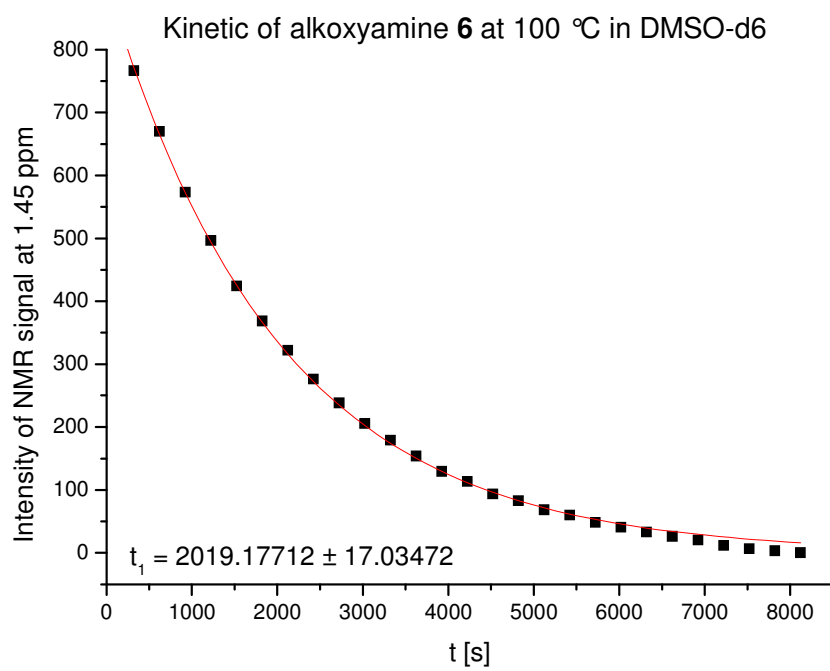

$$k_d = 1/t_1 = 4.95 \times 10^{-4} \text{ s}^{-1}, E_a = 126.3 \text{ kJ/mol}$$

## 1.2 in *p*-Xylene-d10.

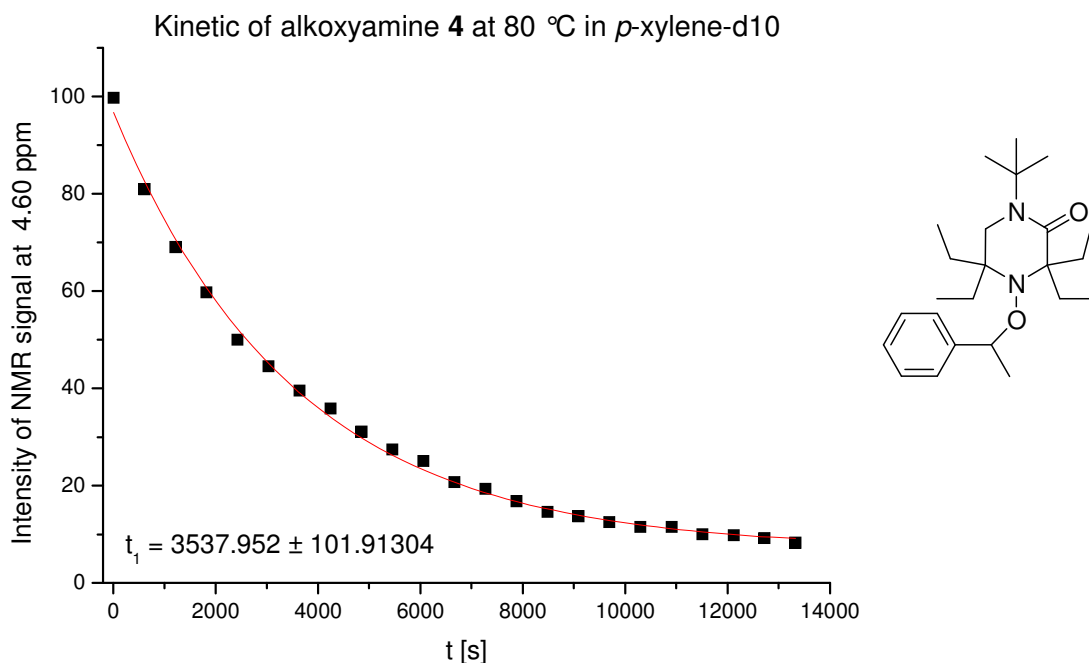

$$k_d = 1/t_1 = 2.83 \times 10^{-4} \text{ s}^{-1}, E_a = 121.2 \text{ kJ/mol}$$

## 2 Simulations.

The equilibrium constant  $K$  was estimated by simulation of the polymerization process and fitting the simulated data to the experimental data. The simulations were performed using *Presto*, a program for modeling nonlinear dynamics.<sup>1</sup> The following reactions were considered in the simulations: Homolysis of the nitroxide-capped dormant polymer chains into the persistent nitroxide radicals  $X^\bullet$  and transient carbon-centered radicals  $R_n^\bullet$  with  $n$  monomer units (*equation 1*, experimentally determined rate constant  $k_d = 1.9 \times 10^{-2} \text{ s}^{-1}$  at 125 °C was used in the simulation). Trapping of the polymeric radicals  $R_n^\bullet$  with the nitroxide  $X^\bullet$  to afford dormant polymeric alkoxyamines  $R_n\text{-}X$  (*equation 2*, rate constant  $k_c$  unknown to be fitted). To simplify the simulation, we assume that all the rate constants remain constant during the polymerization. This is a valid assumption as long as conversions are low and

viscosity effects play a minor role. Furthermore,  $k_d$  is set equal to the rate constant for the homolysis of the initiator alkoxyamine  $R_o-X$  (**4**) and  $k_c$  is set equal to the rate constant of the trapping of the styryl radical derived from the initiator with the nitroxide **10** ( $X^\bullet$ ). Chain propagation occurs with the rate constant  $k_p$  (equation 3,  $k_p = 2318 \text{ M}^{-1}\text{s}^{-1}$ ).<sup>2</sup> Dimerization and/or disproportionation of two polymeric radicals  $R_n^\bullet$  and  $R_m^\bullet$  leading to chain termination are also considered in the simulation (equation 4, rate constant  $k_t = 1.73 \times 10^8 \text{ M}^{-1}\text{s}^{-1}$ ).<sup>3</sup> Moreover, for the important auto polymerization of styrene we assumed the widely accepted initiation third order in styrene as first suggested by Hui and Hamielec (equation 5, rate constant  $k_i = 3.78 \times 10^{-10} \text{ M}^{-2}\text{s}^{-1}$ ).<sup>4</sup> Since disproportionation of the nitroxide  $X^\bullet$  and the growing polymeric radical  $R_n^\bullet$  to form  $H-X$  and the corresponding terminal polymeric olefin  $R_mCH=CHPh$  occurs only to a small extent in nitroxide mediated styrene polymerization,<sup>5</sup> this side reaction was not included into the kinetic scheme to simplify the simulation.

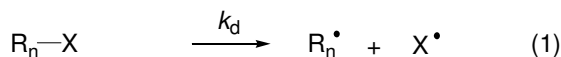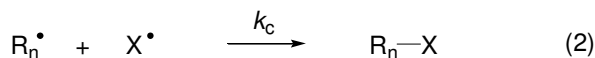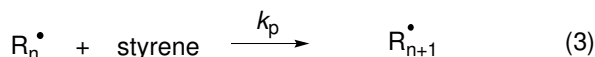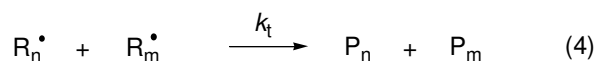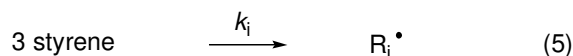

### 3 Experimental Part for the Synthetic Route to Alkoxyamines **5** and **6**.

***N-tert-Butyl-(2-metyl-2-nitro-propyl)-amine.*** *tert*-Butylamine (5.8 ml, 0.56 mol, 1.00 eq) was added to 3-nitropropane (5.0 mL, 0.56 mol, 1.00 eq). Aqueous formaldehyde (37%, 42 ml, 0.56 mol, 1.0 eq) was added over 10 minutes while keeping the temperature between 20-30 °C and the mixture was stirred at 50 °C for 18 h. Pentane (20 mL) was added to the cooled mixture, the organic layer was separated, washed with water (2 × 30 mL) and dried over  $MgSO_4$ . After filtration the solvent was evaporated *in vacuo* and the crude product was

purified by distillation (49-51 °C, 0.1 mbar). The amine was obtained as a white solid (6.57 g, 37.7 mmol, 68%). Mp: 33 °C. IR (neat): 2966 m, 1534 vs, 1498 w, 1437 w, 1373 m, 1344 m, 1291 w, 1232 m, 1208 w, 1109 m, 771 m, 753 m, 718 w cm<sup>-1</sup>. <sup>1</sup>H NMR (300 MHz, CDCl<sub>3</sub>, 300 K):  $\delta$  = 2.90 (s, 2 H, CH<sub>2</sub>), 1.54 (s, 6 H, 2  $\times$  CH<sub>3</sub>), 1.02 (s, 9 H, 3  $\times$  CH<sub>3</sub>). <sup>13</sup>C NMR (75 MHz, CDCl<sub>3</sub>, 300 K):  $\delta$  = 89.1 (C), 51.3 (CH<sub>2</sub>), 50.3 (C), 29.2 (CH<sub>3</sub>), 24.4 (CH<sub>3</sub>). ESI-MS: 175 [M + H]<sup>+</sup>. HRMS (ESI): calcd for [M + H]<sup>+</sup> 175.1441; found 175.1445. Anal. calcd for C<sub>8</sub>H<sub>18</sub>N<sub>2</sub>O<sub>2</sub>: C 55.15, H 10.62, N 16.08; found: C 55.08, H 10.62, N 15.91.

***N-tert-Butyl-(2-ethyl-butane)-1,2-diamine.*** *N-tert-Butyl-(2-methyl-2-nitropropyl)-amine* (1.70 g, 9.76 mmol, 1.00 eq) was stirred in a mixture of AcOH and H<sub>2</sub>O (1:1.5, 35 mL). Zinc powder (5.12 g, 78.3 mmol, 8.00 eq) was added. The reaction mixture was stirred at 80 °C for 2 h and was filtrated directly. The filtrate was evaporated to dryness and the precipitate was dissolved in H<sub>2</sub>O (20 mL), treated with aq. conc. NH<sub>3</sub> (2 mL  $\rightarrow$  pH = 9) and extracted with Et<sub>2</sub>O (3  $\times$  40 mL). The organic layer was dried over K<sub>2</sub>CO<sub>3</sub>, filtrated, and the solvent was evaporated *in vacuo*. The diamine was obtained as a colourless oil (1.35 g, 9.34 mmol, 96%) after FC (CH<sub>2</sub>Cl<sub>2</sub>:MeOH, 10:1). IR (neat): 2968 w, 1608 s, 1578 s, 1207 w, 1065 m, 1014 m, 988 m, 925 w, 672 vs cm<sup>-1</sup>. <sup>1</sup>H NMR (300 MHz, CDCl<sub>3</sub>, 300 K):  $\delta$  = 4.21 (br s, 1 H, NH<sub>2</sub>), 2.50 (s, 2 H, CH<sub>2</sub>), 1.20 (s, 6 H, 2  $\times$  CH<sub>3</sub>), 1.11 (s, 9 H, 3  $\times$  CH<sub>3</sub>). <sup>13</sup>C NMR (75 MHz, CDCl<sub>3</sub>, 300 K):  $\delta$  = 52.7 (CH<sub>2</sub>), 51.7 (C), 51.4 (C), 28.9 (CH<sub>3</sub>), 27.2 (CH<sub>3</sub>). ESI-MS: 145 [M + H]<sup>+</sup>. HRMS (ESI): calcd for [M + H]<sup>+</sup> 145.1669; found 173.1700.

### **General Procedure for the Synthesis of Piperazinones (GP 2)**

The diamine (1 eq) was dissolved in CHCl<sub>3</sub> (1.5 eq) and the respective ketone (12.3 eq) was added. Powdered KOH (5 eq) was added over 10 min at 10 °C. The reaction mixture was stirred for 18 h at rt and filtrated.

**1-*tert*-Butyl-3,3-dipropyl-5,5-diethyl-2-piperazinone.** According to GP 2 diamine **8** (0.50 g, 2.9 mmol, 1.0 eq) was dissolved in CHCl<sub>3</sub> (0.35 mL, 4.4 mmol, 1.5 eq) and 3-heptanone (5.0 mL, 36 mmol, 12 eq) was added. Powdered KOH (0.812 g, 14.5 mmol, 5.00 eq) was

added. The filtrate was evaporated to dryness and the crude product was purified with FC (pentane:Et<sub>2</sub>O, 10:1). The piperazinone was obtained as a yellow oil (430 mg, 1.45 mmol, 50%). IR (neat): 2962 m, 2933 w, 1639 m, 1461 w, 1314 w, 1203 w, 906 vs, 727 vs, 646 s cm<sup>-1</sup>. <sup>1</sup>H NMR (300 MHz, CDCl<sub>3</sub>, 300 K):  $\delta$  = 1.53-1.18 (m, 12 H, 6  $\times$  CH<sub>2</sub>), 1.36 (s, 9 H, 3  $\times$  CH<sub>3</sub>), 0.83 (t, 6  $J$  = 7.3 Hz H, 2  $\times$  CH<sub>3</sub>), 0.80 (t,  $J$  = 7.5 Hz, 6 H, 2  $\times$  CH<sub>3</sub>). <sup>13</sup>C NMR (75 MHz, CDCl<sub>3</sub>, 300 K):  $\delta$  = 174.8 (C), 61.8 (C), 59.3 (C), 53.7 (C), 51.2 (CH<sub>2</sub>), 43.0 (CH<sub>2</sub>), 29.0 (CH<sub>3</sub>), 28.5 (CH<sub>3</sub>), 28.5 (CH<sub>2</sub>), 17.1 (CH<sub>2</sub>), 14.8 (CH<sub>2</sub>), 7.9 (CH<sub>3</sub>). ESI-MS: 297 [M + H]<sup>+</sup>, 319 [M + Na]<sup>+</sup>, 616 [2M + Na]<sup>+</sup>. HRMS (ESI): calcd for [M + H]<sup>+</sup> 297.2900; found 297.2901.

**1-*tert*-Butyl-3,3-diethyl-5,5-methyl-2-piperazinone.** According to GP 2 1,1-dimethyl-2-*tert*-butylaminopropylamine (220 mg, 1.53 mmol, 1.00 eq) was dissolved in CHCl<sub>3</sub> (186  $\mu$ L, 2.3 mmol, 1.50 eq) and 3-pentanone (1.96 mL, 18.5 mmol, 12.3 eq) was added. Powdered KOH (428 mg, 7.65 mmol, 5.00 eq) was added. The filtrate was evaporated to dryness and the crude product was purified with FC (pentane:Et<sub>2</sub>O, 10:1). The piperazinone was obtained as a colourless oil (0.21 g, 0.86 mmol, 56%). IR (neat): 2968 w, 1650 m, 1635 s, 1462 w, 1380 w, 1363 w, 1306 s, 1216 s, 1192 m, 1143 w cm<sup>-1</sup>. <sup>1</sup>H NMR (300 MHz, CDCl<sub>3</sub>, 300 K):  $\delta$  = 3.13 (s, 2 H, CH<sub>2</sub>), 1.72-1.46 (m, 4 H, 2  $\times$  CH<sub>2</sub>), 1.39 (s, 9 H, 3  $\times$  CH<sub>3</sub>), 1.12 (s, 6 H, 2  $\times$  CH<sub>3</sub>), 0.84 (t,  $J$  = 7.5 Hz, 6 H, 2  $\times$  CH<sub>3</sub>). <sup>13</sup>C NMR (75 MHz, CDCl<sub>3</sub>, 300 K):  $\delta$  = 174.3 (C), 62.7 (C), 57.3 (CH<sub>2</sub>), 55.1 (C), 49.3 (C), 32.8 (CH<sub>2</sub>), 28.5 (CH<sub>3</sub>), 8.5 (CH<sub>3</sub>). ESI-MS: 241 [M + H]<sup>+</sup>, 263 [M + Na]<sup>+</sup>, 503 [2M + Na]<sup>+</sup>. HRMS (ESI): calcd for [M + H]<sup>+</sup> 241.2274; found 241.2268.

### General Procedure for the Synthesis of Piperazinon-4-oxyl compounds (GP 3)

Peroxyacetic acid (39% in AcOH, 1.5 eq) was added dropwise over a period of 20 min to a solution of the corresponding piperazinone (1 eq) in EtOAc at 0 °C. After stirring for 2.5 h the reaction mixture was hydrolyzed with water, the phases were separated, and the aqueous layer was extracted with pentane (3  $\times$ ). The organic layer was washed with NaHCO<sub>3</sub> (aq, sat.,  $\rightarrow$



pH = 7) and was dried over MgSO<sub>4</sub>. After filtration solvents were evaporated *in vacuo*. The crude product was purified with FC (pentane:EtOAc, 5:1).

**1-*tert*-Butyl-3,3-dipropyl-5,5-diethyl-2-piperazinon-4-oxyl.** According to GP 3 peroxyacetic acid (388  $\mu$ L, 2.02 mmol, 1.50 eq) was added to a solution of 1-*tert*-butyl-3,3-dipropyl-5,5-diethyl-2-piperazinone (400 mg, 1.35 mmol, 1.00 eq) in EtOAc (5 mL). The reaction mixture was hydrolyzed with water (5 mL), the phases were separated, and the aqueous layer was extracted with pentane (10 mL). The organic layer was washed with NaHCO<sub>3</sub> (aq, sat., 5 mL) and was dried over MgSO<sub>4</sub>. The nitroxide was obtained as a red solid (380 mg, 1.22 mmol, 90%). Mp: 64-66 °C. IR (neat): 2962 w, 2931 w, 2875 w, 1650 s, 1456 m, 1421 w, 1361 w, 1202 m, 1139 m, 751 w cm<sup>-1</sup>. ESI-MS: 312 [M + H]<sup>+</sup>, 334 [M + Na]<sup>+</sup>, 646 [2M + Na]<sup>+</sup>. HRMS (ESI): calcd for [M + Na]<sup>+</sup> 334.2591; found 334.2590. Anal. calcd for C<sub>18</sub>H<sub>35</sub>N<sub>2</sub>O<sub>2</sub>: C 69.41, H 11.33, N 8.99; found: C 69.43, H 11.36, N 8.99.

**1-*tert*-Butyl-3,3-diethyl-5,5-methyl-2-piperazinon-4-oxyl.** According to GP 3 peroxyacetic acid (240  $\mu$ L, 1.25 mmol, 1.50 eq) was added to a solution of 1-*tert*-butyl-3,3-diethyl-5,5-methyl-2-piperazinone (0.20 g, 0.83 mmol, 1.0 eq) in EtOAc (3 mL). The reaction mixture was hydrolyzed with water (3 mL), the phases were separated, and the aqueous layer was extracted with pentane (6 mL). The organic layer was washed with NaHCO<sub>3</sub> (aq, sat., 3 mL) and was dried over MgSO<sub>4</sub>. The nitroxide was obtained as a red solid (195 mg, 763  $\mu$ mol, 92%). Mp: 49-50 °C. IR (neat): 2968 m, 2937 m, 2880 w, 1460 m, 1380 m, 1343 m cm<sup>-1</sup>. ESI-MS: 256 [M + H]<sup>+</sup>, 278 [M + Na]<sup>+</sup>, 533 [2M + Na]<sup>+</sup>. HRMS (ESI): calcd for [M + Na]<sup>+</sup> 278.1965; found 278.1963. Anal. calcd for C<sub>14</sub>H<sub>27</sub>N<sub>2</sub>O<sub>2</sub>: C 65.84, H 10.66, N 10.97; found: C 65.83, H 10.69, N 10.91.

#### 4 Evidence of Livingness of the Polymer Chains with Alkoxyamine 4 by Mass Spectrometry.

Livingness of the *n*-butyl acrylate polymerization was also proofed for alkoxyamine **4** in the same way as described in the paper. After 5 h polymerization was stopped and the crude product was analyzed by mass spectrometry and by using the simulation software *PolyCalc*. The spectra obtained (Figure 1a, c) clearly showed that all the chains were end-functionalized by the nitroxide moiety.  $M_n$  and PDI were determined by *PolyCalc* ( $M_n = 2600$ , PDI = 1.28) being in good agreement with GPC results ( $M_n = 2900$ , PDI = 1.47). The polymeric alkoxyamine was used as a macroinitiator (1 mol%) for reinitiation of *n*-butylacrylate polymerization (5 h). Mass analysis proved that reinitiation was successful and that the elongated poly-*n*-butylacrylate still carried nitroxide moieties at the chain terminus (Figure 1b, d).  $M_n$  and PDI were determined by *PolyCalc* ( $M_n = 6100$ , PDI = 1.26) and by GPC ( $M_n = 7800$ , PDI = 1.30).

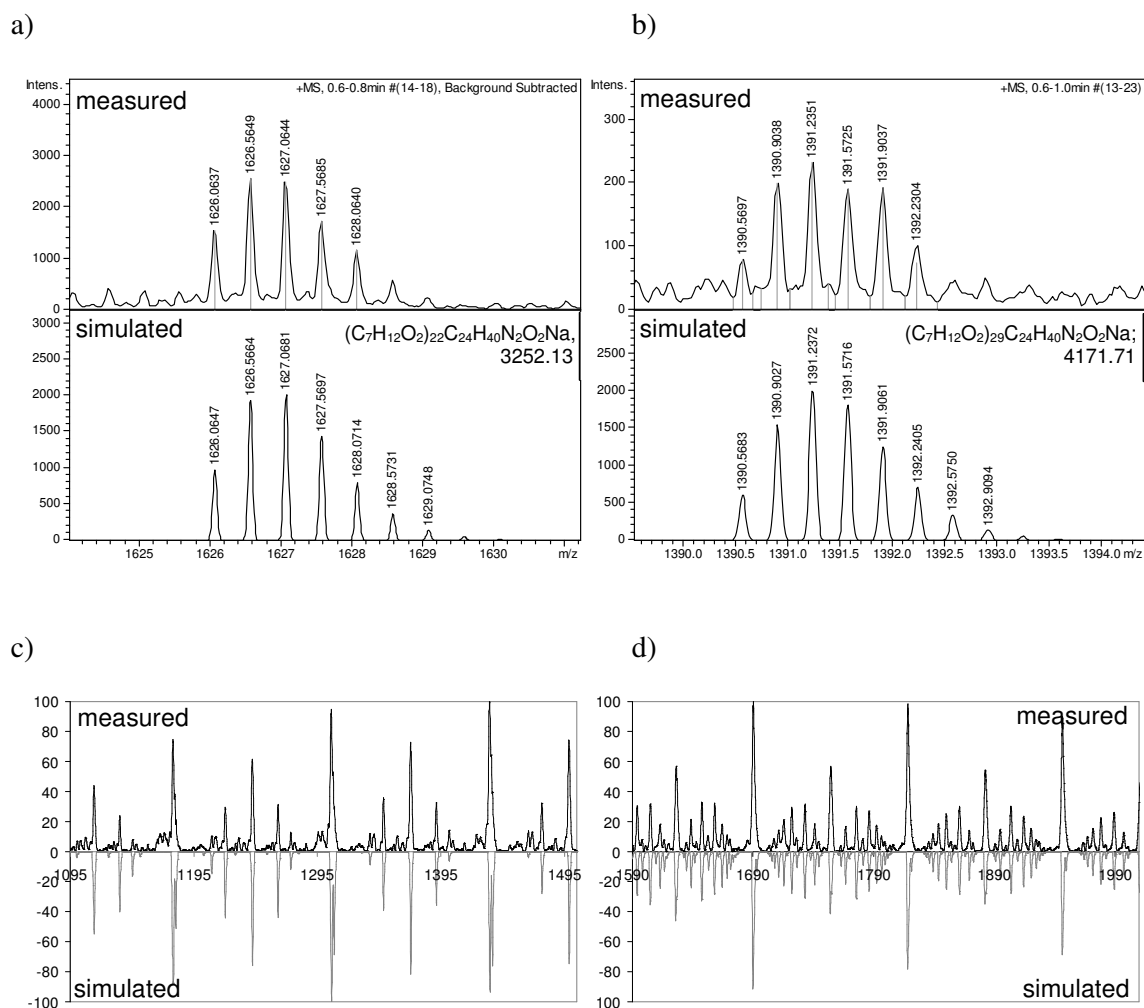

**Figure 1.** Characteristic region of a high resolution ESI-TOF mass spectrum and the corresponding simulated spectrum: a) after 5 h polymerization. b) after reinitiation and further polymerization for 5 h.

Comparison of the measured (upper part) and simulated (lower part) spectrum after parameter optimization: c) after 5 h polymerization. b) after reinitiation and further polymerization for 5 h.

## 5 References.

1. M. Wulkow, *Presto-Kinetics* 3.30.2a, CiT, 2006.
2. M. Buback, R. G. Gilbert, R. A. Hutchinson, B. Klumperman, F. D. Kuchta, B. G. Manders, K. F. Odriscoll, G. T. Russell, J. Schweer, *Macromol. Chem. Phys.* **1995**, *196*, 3267.
3. M. Buback, F. D. Kuchta, *Macromol. Chem. Phys.* **1997**, *198*, 1455.
4. A. W. Hui, A. E. Hamielec, *J. Appl. Polym. Sci.* **1972**, *16*, 749.
5. G. S. Ananchenko, H. Fischer, *J. Polym. Sci., Part A : Polym. Chem.* **2001**, *39*, 3604.
